# Supplementary material for: Investigating Biomarkers for USH2A Retinopathy Using Multimodal Retinal Imaging
Source: MDPI journal article supplement (doi:10.3390/ijms23084198), 2022-04-11
Supplement: s1 [file s1]

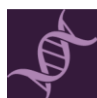

Article

# Investigating Biomarkers for *USH2A* Retinopathy Using Multimodal Retinal Imaging

Jasdeep S. Gill <sup>1</sup>, Vasileios Theofylaktopoulos <sup>1</sup>, Andreas Mitsios <sup>1,2</sup>, Sarah Houston <sup>1</sup>, Ahmed M. Hagag <sup>1,2</sup>, Adam M. Dubis <sup>1,2,3,†</sup> and Mariya Moosajee <sup>1,2,4,\*,†</sup>

<sup>1</sup> Institute of Ophthalmology, University College London, London EC1V 9EL, UK; j.gill.17@ucl.ac.uk (J.S.G.); v.theofylaktopoulos@ucl.ac.uk (V.T.); andreas.mitsios@ucl.ac.uk (A.M.); sarah.houston.16@ucl.ac.uk (S.H.); a.hagag@ucl.ac.uk (A.M.H.); a.dubis@ucl.ac.uk (A.M.D.)

<sup>2</sup> NIHR Moorfields Biomedical Research Centre, Moorfields Eye Hospital NHS Foundation Trust, London EC1V 2PD, UK

<sup>3</sup> Global Business School for Health, University College London, London WC1E 6BT, UK

<sup>4</sup> Great Ormond Street Hospital for Children NHS Foundation Trust, London WC1N 3JH, UK

\* Correspondence: m.moosajee@ucl.ac.uk; Tel.: +44-207-608-6971

† These authors contributed equally to this work.

**Citation:** Gill, J.S.; Theofylaktopoulos, V.; Mitsios, A.; Houston, S.; Hagag, A.M.; Dubis, A.M.; Moosajee, M. Investigating Biomarkers for *USH2A* Retinopathy Using Multimodal Retinal Imaging. *Int. J. Mol. Sci.* **2022**, *23*, 4198. <https://doi.org/10.3390/ijms23084198>

Academic Editor: Stephanie C. Joachim

Received: 1 March 2022

Accepted: 6 April 2022

Published: 11 April 2022

**Publisher's Note:** MDPI stays neutral with regard to jurisdictional claims in published maps and institutional affiliations.

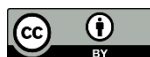

**Copyright:** © 2022 by the authors. Submitted for possible open access publication under the terms and conditions of the Creative Commons Attribution (CC BY) license (<https://creativecommons.org/licenses/by/4.0/>).

**Tables S1–S3.** Correlation with age, best-corrected visual acuity (Snellen), and between metrics is shown using the coefficient of determination ( $R^2$ ). The number of subjects included in each analysis is denoted by  $n$ , with a mean value combining paired eyes calculated for each metric.  $p < 0.05$  is considered statistically significant.

**Table S1.** Age and functional correlation of retinal imaging in *USH2A* retinopathy.

| Imaging Modality | Correlation of:     | $n$ | with Age |       | with BCVA |            |
|------------------|---------------------|-----|----------|-------|-----------|------------|
|                  |                     |     | $R^2$    | $p$   | $R^2$     | $p$        |
| FAF              | IR Diameter         | 16  | 0.309    | 0.03* | 0.496     | 0.002**    |
|                  | OR Diameter         | 16  | 0.288    | 0.03* | 0.353     | 0.02*      |
| SD-OCT           | EZ Width            | 15  | 0.246    | 0.06  | 0.717     | < 0.001*** |
|                  | ELM Width           | 14  | 0.090    | 0.30  | 0.653     | < 0.001*** |
|                  | EZ Reflectance      | 16  | 0.220    | 0.07  | 0.712     | < 0.001*** |
| AOSLO            | Foveal Cone Density | 16  | 0.377    | 0.01* | 0.642     | < 0.001*** |
|                  | IMPM Diameter       | 16  | 0.300    | 0.03* | 0.409     | 0.008**    |

**Table S2.** Intramodal retinal imaging correlation in *USH2A* retinopathy.

| Imaging Modality | Correlation of:                        | $n$ | $R^2$ | $p$        |
|------------------|----------------------------------------|-----|-------|------------|
| FAF              | IR Diameter with OR Diameter           | 16  | 0.928 | < 0.001*** |
| SD-OCT           | EZ Width with ELM Width                | 14  | 0.962 | < 0.001*** |
|                  | EZ Width with EZ Reflectance           | 15  | 0.451 | 0.006**    |
|                  | ELM Width with EZ Reflectance          | 14  | 0.592 | 0.001**    |
| AOSLO            | Foveal Cone Density with IMPM Diameter | 16  | 0.609 | < 0.001*** |

**Table S3.** Multimodal retinal imaging correlation in *USH2A* retinopathy.

| Imaging Modality    | Correlation of:                         | $n$ | $R^2$ | $p$        |
|---------------------|-----------------------------------------|-----|-------|------------|
| FAF versus SD-OCT   | IR Diameter with EZ Width               | 15  | 0.998 | < 0.001*** |
|                     | IR Diameter with ELM Width              | 14  | 0.963 | < 0.001*** |
|                     | IR Diameter with EZ Reflectance         | 16  | 0.331 | 0.02*      |
|                     | OR Diameter with EZ Width               | 15  | 0.896 | < 0.001*** |
|                     | OR Diameter with ELM Width              | 14  | 0.995 | < 0.001*** |
|                     | OR Diameter with EZ Reflectance         | 16  | 0.196 | 0.09       |
| SD-OCT versus AOSLO | EZ Width with Foveal Cone Density       | 15  | 0.738 | < 0.001*** |
|                     | EZ Width with IMPM Diameter             | 15  | 0.992 | < 0.001*** |
|                     | ELM Width with Foveal Cone Density      | 14  | 0.693 | < 0.001*** |
|                     | ELM Width with IMPM Diameter            | 14  | 0.963 | < 0.001*** |
|                     | EZ Reflectance with Foveal Cone Density | 16  | 0.658 | < 0.001*** |
| FAF versus AOSLO    | EZ Reflectance with IMPM Diameter       | 16  | 0.271 | 0.04*      |
|                     | IR Diameter with Foveal Cone Density    | 16  | 0.695 | < 0.001*** |
|                     | IR Diameter with IMPM Diameter          | 16  | 0.981 | < 0.001*** |
|                     | OR Diameter with Foveal Cone Density    | 16  | 0.506 | 0.002**    |
|                     | OR Diameter with IMPM Diameter          | 16  | 0.941 | < 0.001*** |

**Abbreviations:** AOSLO, adaptive optics scanning laser ophthalmoscopy; BCVA, best-corrected visual acuity; ELM, external limiting membrane; EZ, ellipsoid zone; FAF, fundus autofluorescence; IMPM, intact macular photoreceptor mosaic; IR, inner hyperautofluorescent ring; OR, outer hyperautofluorescent ring; SD-OCT, spectral-domain optical coherence tomography.
